# Supplementary material for: The effect of metal matrix M (M = Co, Ni, Cu) on the water dissociation performance of oxophilic Cr from density functional theory
Source: Royal Society of Chemistry journal article supplement (doi:10.1039/d3nj02432f), 2023-01-01
Supplement: d3nj02432f1.pdf [file d3nj02432f1.pdf]

**Supporting information for**  
**Effect of metal matrix M (M=Co, Ni, Cu) on the water**  
**dissociation performance of oxophilic Cr from density functional**  
**theory**

Chao Kong<sup>a\*</sup>, Yanxia Han<sup>a</sup>, Lijie Hou<sup>a</sup>, Liguao Gao<sup>b\*</sup>

(<sup>a</sup> College of Petrochemical Engineering, Longdong University, Qingyang 745000,  
China)

(<sup>b</sup> College of Chemistry and Chemical Engineering, Yulin University, Yulin 719000,  
China)

\*Corresponding author. E-mail address: [kongchao010@163.com](mailto:kongchao010@163.com) (C. Kong),  
[liguogao@yulinu.edu.cn](mailto:liguogao@yulinu.edu.cn) (L. Gao).

**Table S1**  $\Delta E_{H_2O}$ ,  $\Delta E_H$ ,  $\Delta E_{OH}$ ,  $\Delta E_O$  on active sites of Cr, M (Co, Ni, Cu), and Cr-M surface.

| Sample | Adsorption energy | Site [a/1]   | Site [b/2]   | Site [c/3]   | Site [d/4] |
|--------|-------------------|--------------|--------------|--------------|------------|
| Cr     | $\Delta E_{H_2O}$ | -1.44        | -            | <b>-1.58</b> | -          |
|        | $\Delta E_H$      | -            | <b>-1.59</b> | -            | -          |
|        | $\Delta E_{OH}$   | -            | <b>-5.50</b> | -            | -          |
|        | $\Delta E_O$      | -3.82        | <b>-5.23</b> | -            | -          |
| Co     | $\Delta E_{H_2O}$ | <b>-0.56</b> | -            | -            | -0.51      |
|        | $\Delta E_H$      | -            | <b>-0.67</b> | -0.65        | -          |
|        | $\Delta E_{OH}$   | -            | -3.70        | <b>-3.75</b> | -          |
|        | $\Delta E_O$      | -            | -2.86        | <b>-2.91</b> | -          |
| Cr-Co  | $\Delta E_{H_2O}$ | <b>-0.95</b> | -            | -            | -          |
|        | $\Delta E_H$      | -            | <b>-0.66</b> | -0.63        | -          |
|        | $\Delta E_{OH}$   | -3.55        | -4.11        | <b>-4.15</b> | -          |
|        | $\Delta E_O$      | -2.84        | -3.48        | <b>-3.58</b> | -          |
| Ni     | $\Delta E_{H_2O}$ | <b>-0.59</b> | -            | -            | -          |
|        | $\Delta E_H$      | -            | <b>-0.65</b> | -0.64        | -          |
|        | $\Delta E_{OH}$   | -            | <b>-3.47</b> | -3.35        | -          |
|        | $\Delta E_O$      | -            | <b>-2.51</b> | -2.39        | -          |
| Cr-Ni  | $\Delta E_{H_2O}$ | <b>-1.07</b> | -            | -            | -          |
|        | $\Delta E_H$      | -            | <b>-0.73</b> | -0.68        | -          |

|       |                   |              |              |       |   |
|-------|-------------------|--------------|--------------|-------|---|
|       | $\Delta E_{OH}$   | -3.64        | <b>-3.93</b> | -3.81 | - |
|       | $\Delta E_O$      | -2.94        | <b>-3.30</b> | -3.26 | - |
| Cu    | $\Delta E_{H_2O}$ | <b>-0.40</b> | -            | -     | - |
|       | $\Delta E_H$      | -            | <b>-0.29</b> | -0.28 | - |
|       | $\Delta E_{OH}$   | -            | <b>-3.07</b> | -3.01 | - |
|       | $\Delta E_O$      | -            | <b>-1.79</b> | -1.69 | - |
| Cr-Cu | $\Delta E_{H_2O}$ | <b>-0.89</b> | -            | -     | - |
|       | $\Delta E_H$      | 0.23         | <b>-0.44</b> | -0.43 | - |
|       | $\Delta E_{OH}$   | -3.56        | <b>-3.66</b> | -3.61 | - |
|       | $\Delta E_O$      | -2.71        | <b>-2.89</b> | -2.81 | - |

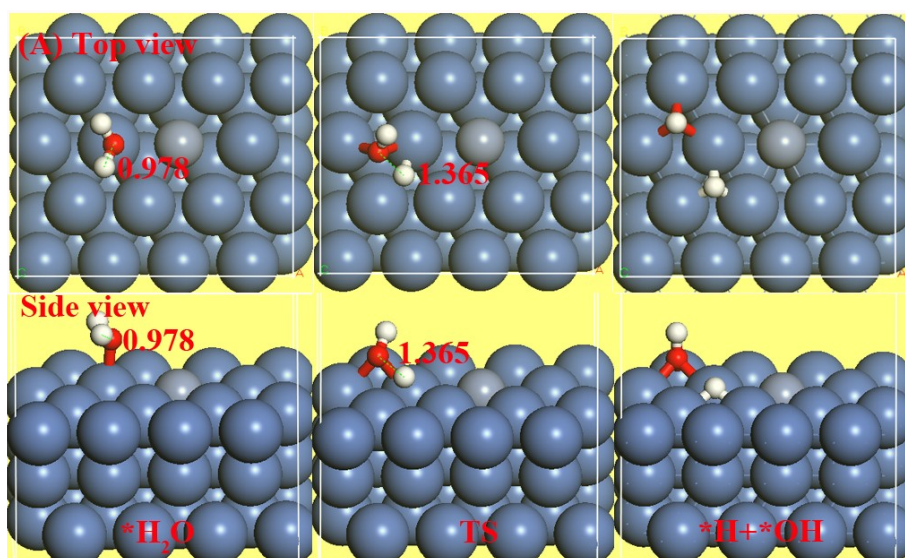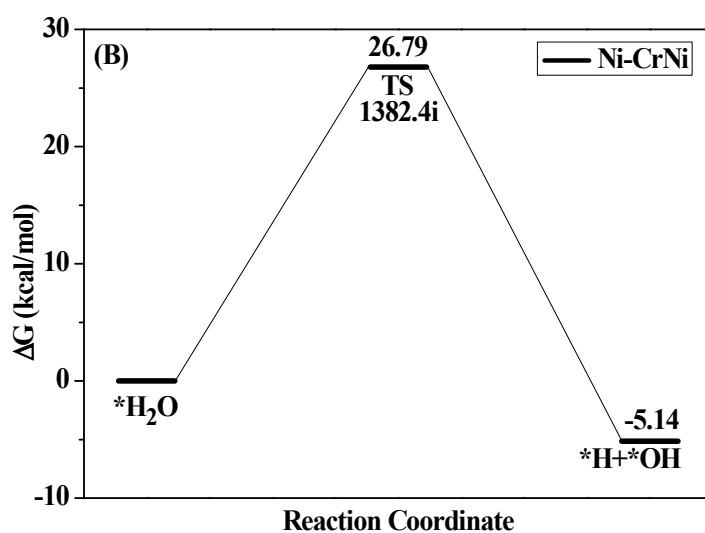

**Fig. S1** (A) Optimized geometries of initial state, transition state, and final state in H<sub>2</sub>O dissociation step on Ni adjacent to Cr in Cr-Ni (the unit of bond length is Å, the gray-blue, gray, white, and red balls represent Ni, Cr, H, and O atom, respectively); (B) Potential energy diagram for H<sub>2</sub>O dissociation pathway on Ni adjacent to Cr in Cr-Ni.

**Table S2**  $\Delta G_H$  (eV) on active sites of Cr, M (Co, Ni, Cu), and Cr-M surface.

| Sample | Site [a/1] | Site [b/2] | Site [c/3] | Site [d/4] |
|--------|------------|------------|------------|------------|
| Cr     | -          | -1.34      | -          | -          |
| Co     | -          | -0.43      | -0.42      | -          |
| Cr-Co  | -          | -0.43      | -0.40      | -          |
| Ni     | -          | -0.41      | -0.40      | -          |
| Cr-Ni  | -          | -0.49      | -0.44      | -          |
| Cu     | -          | -0.05      | -0.05      | -          |
| Cr-Cu  | 0.39       | -0.20      | -0.19      | -          |

**Table S3** HER performance on reported transition metal catalysts in alkaline

| Catalyst   | electrolyte                                       |                                      |                                        |
|------------|---------------------------------------------------|--------------------------------------|----------------------------------------|
|            | Current density<br>( $-j$ , mA cm <sup>-2</sup> ) | $-\eta$ at corresponding<br>$j$ (mV) | Tafel slope<br>(mV dec <sup>-1</sup> ) |
| Cu [21]    | 8                                                 | 575~580                              | 143                                    |
| Ni [22]    | 10                                                | 322                                  | 164                                    |
| Co [38]    | 10                                                | ~250                                 | 161                                    |
| Cr-Ni [22] | 10                                                | 203                                  | 124                                    |
| Cr [22]    | 0.1                                               | ~500                                 | -                                      |
